# Supplementary material
Source: publisher figshare collection journal article supplement (https://plos.figshare.com/articles/dataset/_/732202)
Supplement: Supplementary file [file 1]

# Non-operated Patients with PC

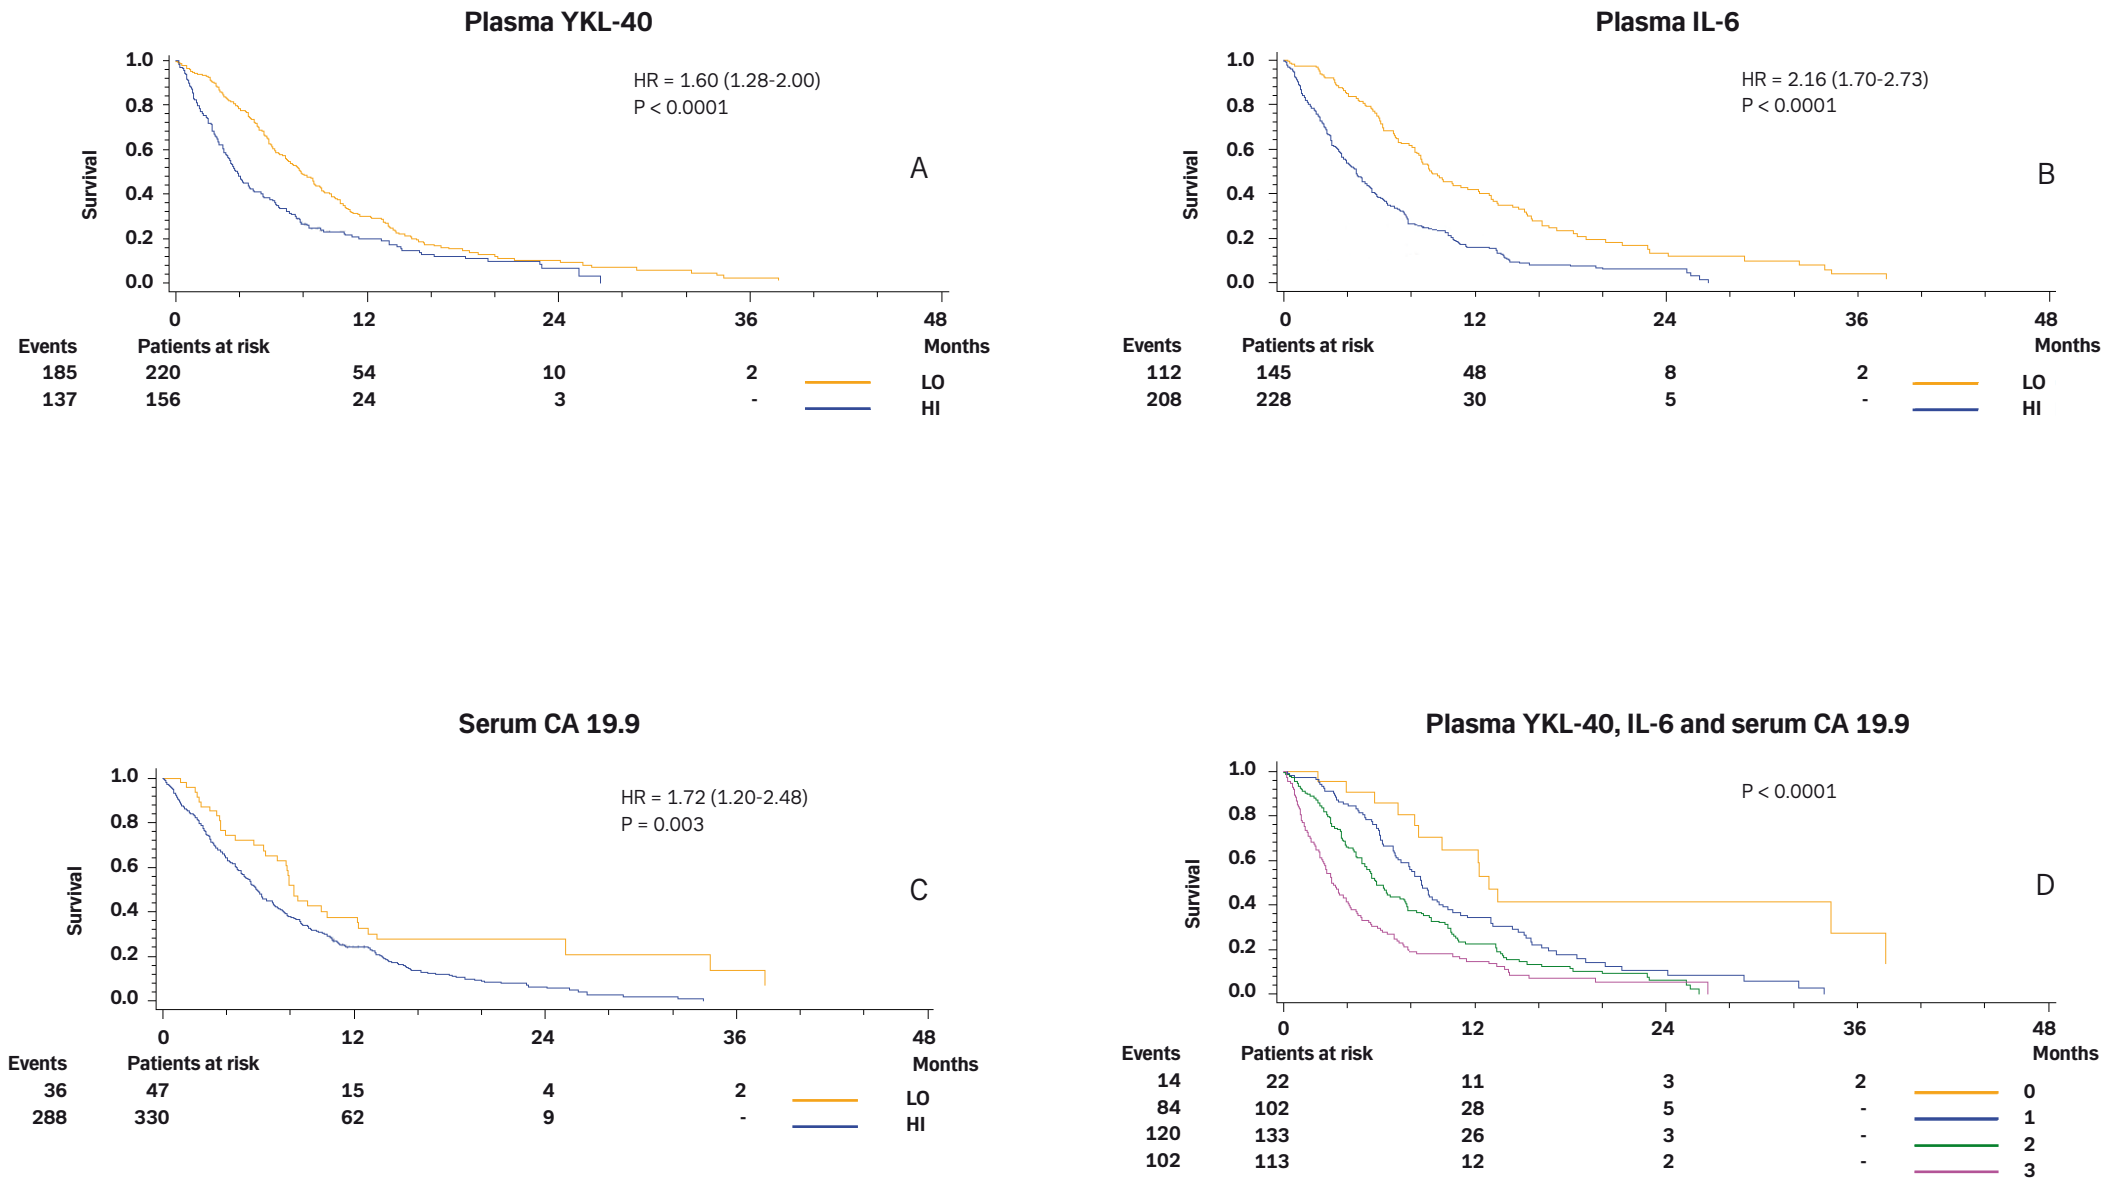

Supplementary Figure 2
